# Supplementary material
Source: PubMed Central journal article supplement (PMC6296224)

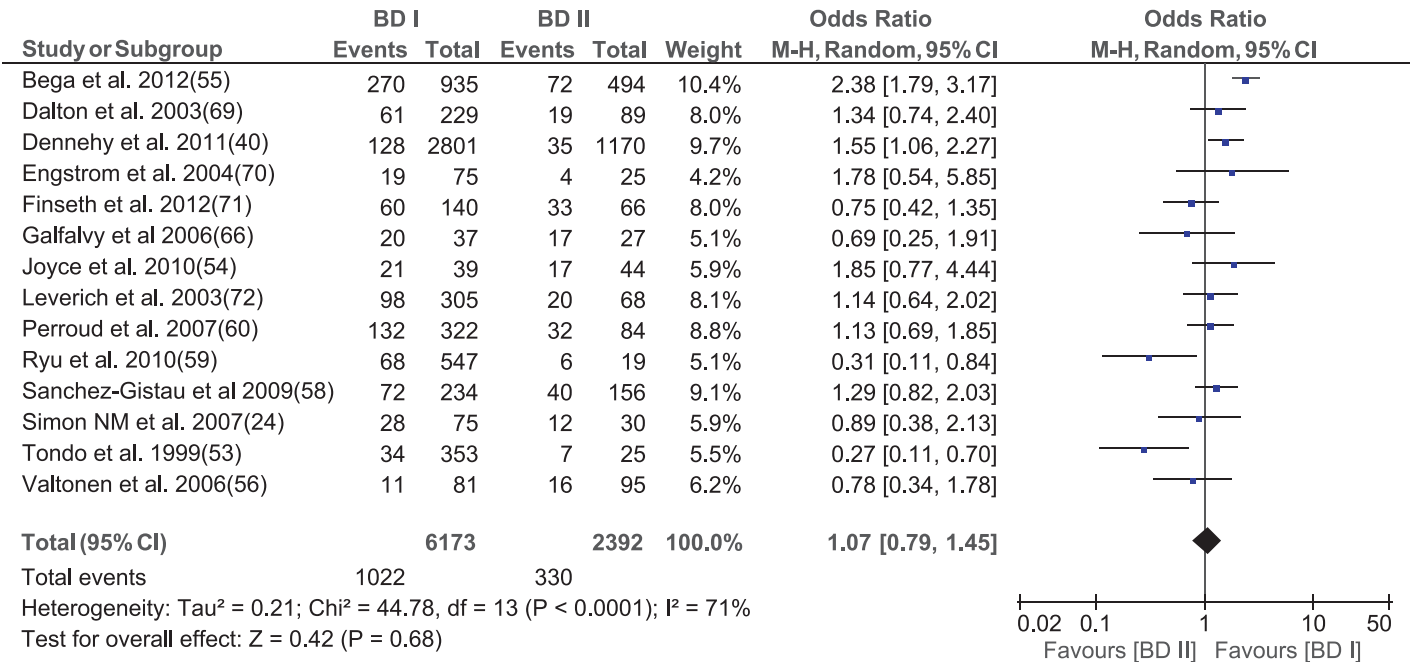

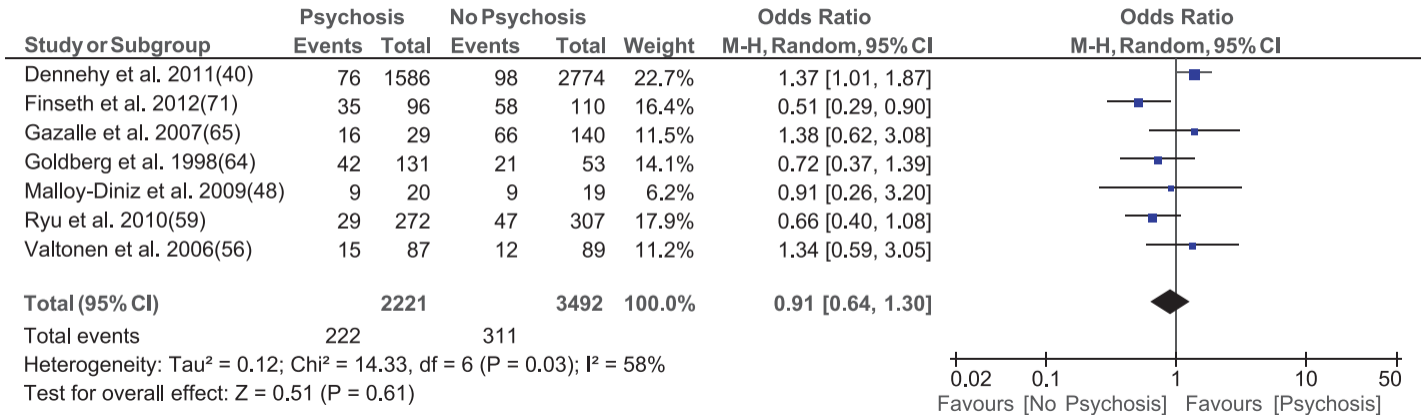

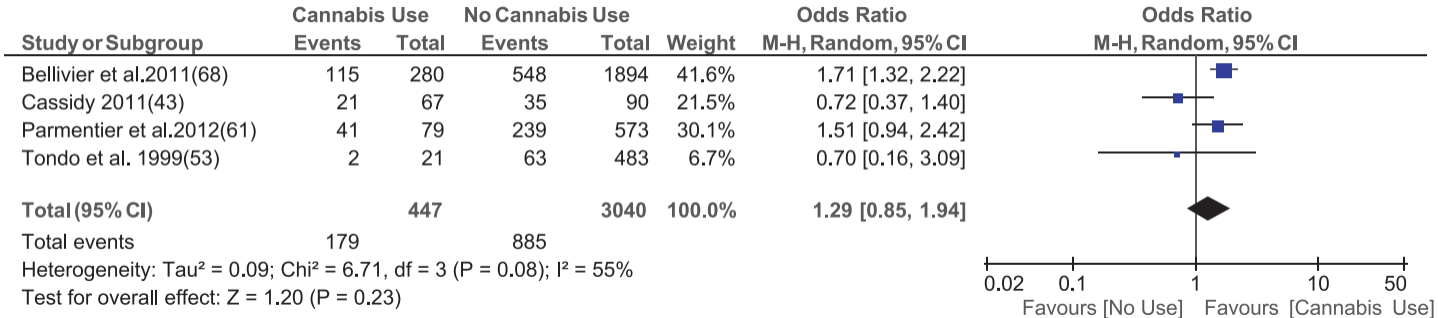

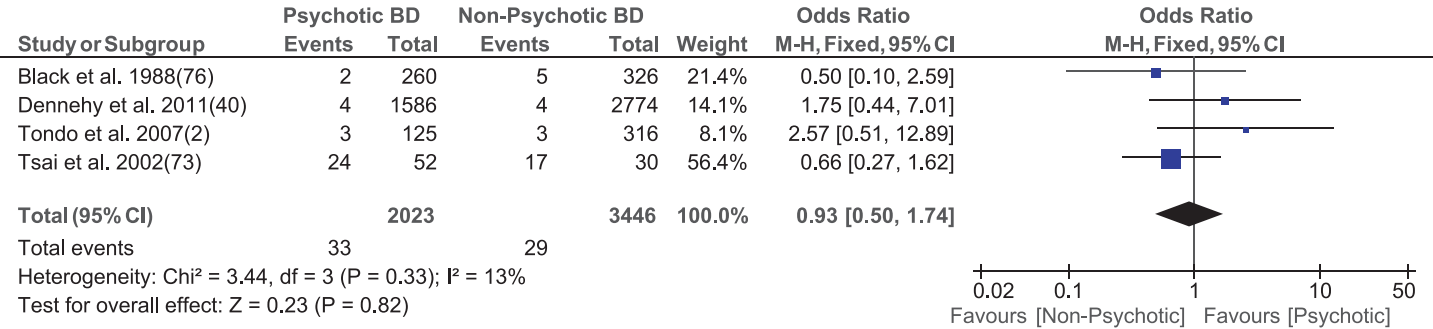

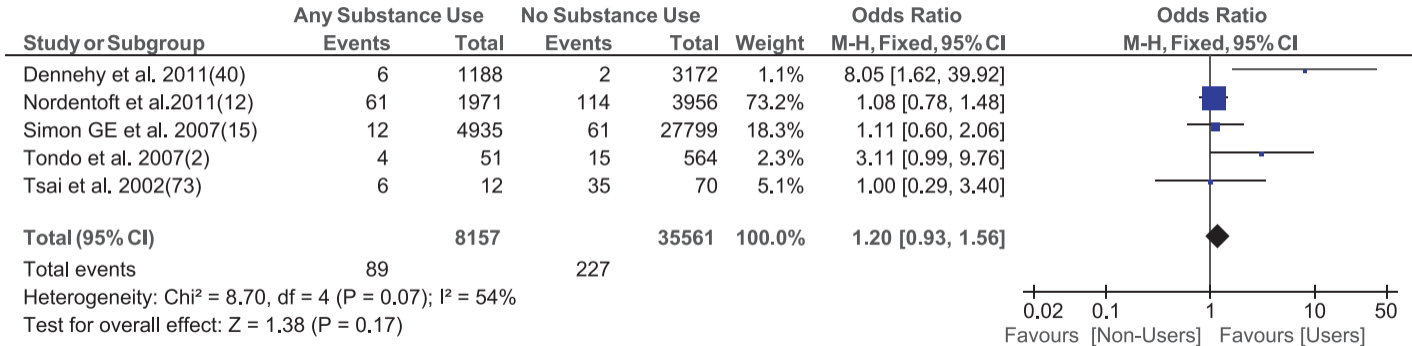

Supplement: NIHMS631681-supplement-Supp_FigureS1-S5.pdf [file NIHMS631681-supplement-Supp_FigureS1-S5.pdf]
